# Supplementary material
Source: publisher site journal article supplement (https://www.dovepress.com/article/540152)
Supplement: Supplementary file 1 [file Supplementary%20Materials%20new%20CLEAN.docx]

Table S1 Flow cytometry antibodies used in this study

| **Antigen** | **Fluorochrome** | **Catalog No.** | **Clone** | **Manufacturer** |
| --- | --- | --- | --- | --- |
| CD3 | FITC | 662965 | SK7 | Beckman Coulter |
| CD4 | APC | 662965 | SK3 | Beckman Coulter |
| CD8 | PE | 662965 | SK1 | Beckman Coulter |
| CD45 | PerCP | 662965 | 2D1 | Beckman Coulter |
| CD25 | BV421 | 564033 | 2A3 | BD Biosciences |
| CD28 | BV510 | 563075 | CD28.2 | BD Biosciences |

Note: FITC, PE, APC, PerCP, BV421, and BV510 refer to fluorescein isothiocyanate, phycoerythrin, allophycocyanin, peridinin chlorophyll protein, Brilliant Violet 421, and Brilliant Violet 510, respectively. All antibodies were used for surface staining in flow cytometric analysis of peripheral blood T lymphocytes.

Table S2 Post hoc power analysis of progressive MS subgroups (G*Power 3.1, α = 0.05)

| **Subgroup** | **Sample size (EOMS vs. LOMS)** | **Achieved power (%)** |
| --- | --- | --- |
| PPMS | 7 vs. 4 | 18.2 |
| SPMS | 12 vs. 1 | 11.6 |

Note:

Post hoc power analyses were conducted using G*Power 3.1 with a two-tailed test and α = 0.05. Due to the very small sample sizes in the progressive subgroups, the achieved power was <20%, indicating that the study is underpowered for these analyses. Therefore, the subgroup results should be interpreted as exploratory and require validation in larger, prospective cohorts.
